# Supplementary material
Source: publisher figshare collection journal article supplement (https://acs.figshare.com/ndownloader/files/22178853)
Supplement: Supplementary file 1 [file 22178853]

# Indocyanine Green (ICG)-Coated Polycaprolactone (PCL) Micelles for Fluorescence Imaging of Tumors

*Lijun Luo,<sup>†,‡,§</sup> Lesan Yan,<sup>†,§</sup> Ahmad Amirshaghaghi,<sup>†</sup> Yulong Wei,<sup>†</sup> Tianyan You,<sup>‡</sup> Sunil Singhal,<sup>§</sup> Andrew Tsourkas,<sup>\*,†</sup> and Zhiliang Cheng<sup>\*,†</sup>*

<sup>†</sup>Department of Bioengineering, School of Engineering and Applied Sciences, University of Pennsylvania, Philadelphia, Pennsylvania 19104, United States.

<sup>‡</sup>School of Agricultural Equipment Engineering, Jiangsu University, Zhenjiang, Jiangsu 212013, China

<sup>§</sup>Center for Precision Surgery, Perelman School of Medicine, University of Pennsylvania, Philadelphia, Pennsylvania; Division of Thoracic Surgery, Department of Surgery, Perelman School of Medicine, University of Pennsylvania, Philadelphia, Pennsylvania 19104, United States.

## Corresponding Author

**\*Email:** atsourk@seas.upenn.edu or zcheng@seas.upenn.edu

## Author Contributions

<sup>+</sup> L.L. and L.Y. contributed equally to this work.

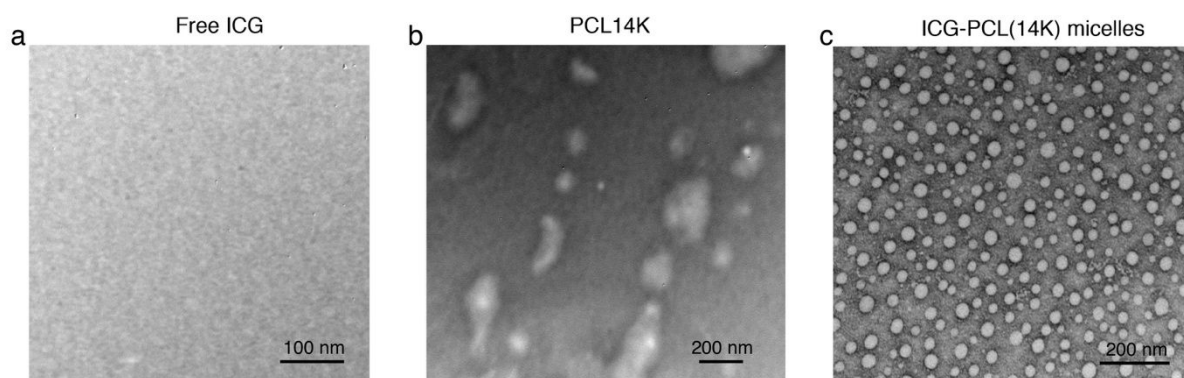

**Figure S1.** TEM images of (a) free ICG, (b) free PCL (MW 14K) and (c) ICG-PCL micelles. Condition: staining with 2%  $\text{WPO}_4$  (pH=7.0). Neither free ICG nor free PCL can form micelles when using the same protocol that led to the formation of ICG-PCL micelles.

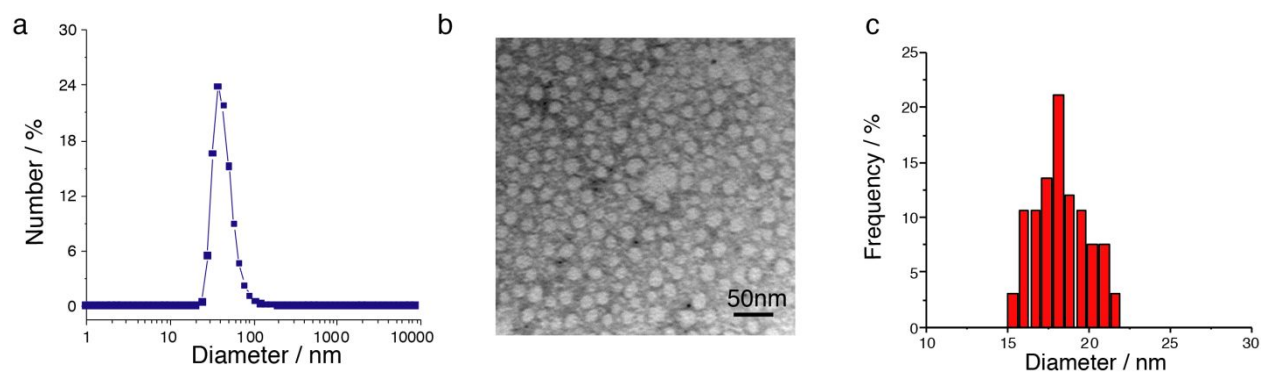

**Figure S2.** Characterization of ICG-PCL (MW: 5K) micelles. (a) Dynamic light scattering (DLS) of the ICG-PCL micelles. (b) Transmission electron microscopy (TEM) image of the ICG-PCL micelles. (c) Quantitative analysis of ICG-PCL micelle size, based on TEM images.

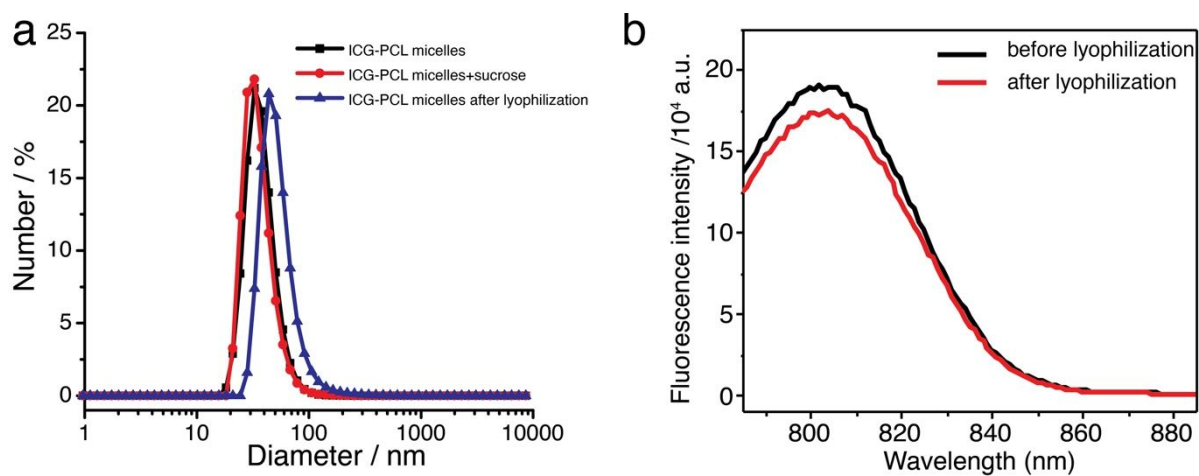

**Figure S3.** Effect of lyophilization on ICG-PCL micelles size (a) and fluorescence property (b). All measurements were performed in water.

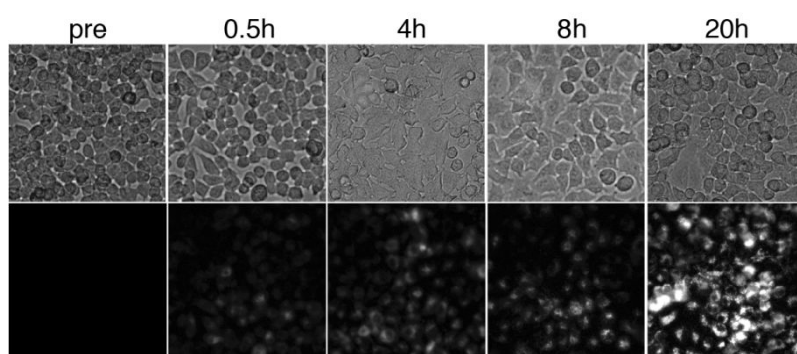

**Figure S4.** Phase contrast (top row) and fluorescence microscopy (bottom row) images of A549 cells incubated with ICG-PCL micelles. Images were acquired prior to addition of the micelles and at various times after the addition of micelles.

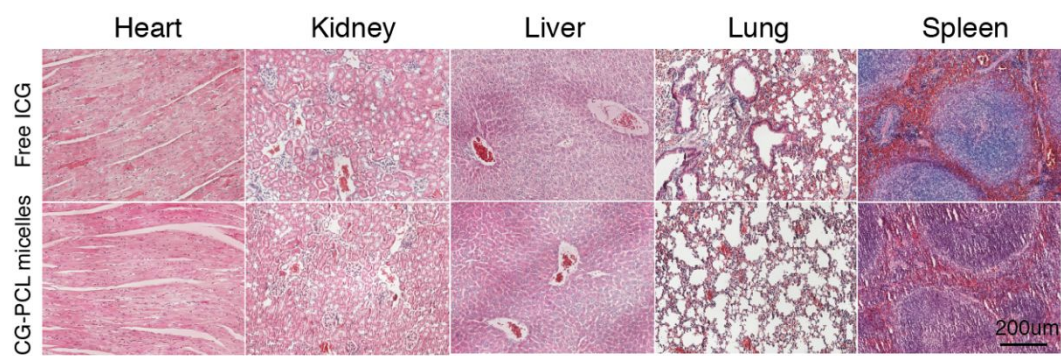

**Figure S5.** H&E stained organ sections. Organs were excised from A549 tumor bearing mice 24 h post-administration of free ICG (upper) and ICG-PCL micelles (bottom). The images were obtained using a Zeiss microscope at low magnification (20x).

**Table S1.** Physical-chemical properties of ICG-PCL.

| Starting ICG:PCL<br>Ratio (w/w)     | PCL 5K |       |       | PCL 14K |       |       | PCL 45K |       |       |
|-------------------------------------|--------|-------|-------|---------|-------|-------|---------|-------|-------|
|                                     | 1:1    | 1:2   | 1:4   | 1:1     | 1:2   | 1:4   | 1:1     | 1:2   | 1:4   |
| <b>Encapsulation Efficiency (%)</b> | 54.70  | 22.29 | 2.97  | 52.80   | 15.78 | 8.50  | 42.15   | 38.43 | 7.97  |
| <b>Loading Efficiency (%)</b>       | 27.35  | 7.43  | 0.59  | 26.40   | 5.26  | 1.70  | 21.07   | 12.81 | 1.60  |
| <b>Hydrodynamic Diameter (nm)</b>   | 43.76  | 57.42 | 71.02 | 42.41   | 55.72 | 72.56 | 62.77   | 88.89 | 103.7 |
| <b>PDI</b>                          | 0.199  | 0.108 | 0.134 | 0.184   | 0.112 | 0.132 | 0.171   | 0.219 | 0.175 |
